# Supplementary material for: Surfactant-assisted direct electron transfer between multi-copper oxidases and carbon nanotube-based porous electrodes
Source: Royal Society of Chemistry journal article supplement (doi:10.1039/c4cp00872c), 2014-01-01
Supplement: c4cp00872c1.pdf [file c4cp00872c1.pdf]

COMMUNICATION

**Information 1: Evaluation of the amount of surfactants adsorbed.**

For the evaluation of the amount of surfactant, we used a larger size of CNTF sheet (Fig. 1a; area  $2 \times 2$  cm<sup>2</sup>; thickness, 1 mm; weight, ca. 2 mg), prepared by the same condition as the CNTF films used for CV experiments. This CNTF sheet was cut to a smaller pieces (weight, 0.1 ~ 0.6 mg) and treated with surfactant by immersing in the 0.1 wt% surfactant solution in a vacuum for 1 h. The surfactant-modified CNTF pieces were thoroughly rinsed by immersing in the distilled water with stirring for 1h, followed by drying at 150 °C in a vacuum for 1 h. The amount of surfactants adsorbed (around 100 µg) was measured by weighting the CNTF pieces before and after the treatment by using a precision balance (Sartorius ME5, 0.1 µg accuracy). The density of adsorption (molecules / nm<sup>2</sup>) were calculated by assuming the specific surface area of CNTF as 1300 m<sup>2</sup> g<sup>-1</sup>,<sup>1,2</sup> and plotted in Fig. 1b for the three kinds of surfactants (n

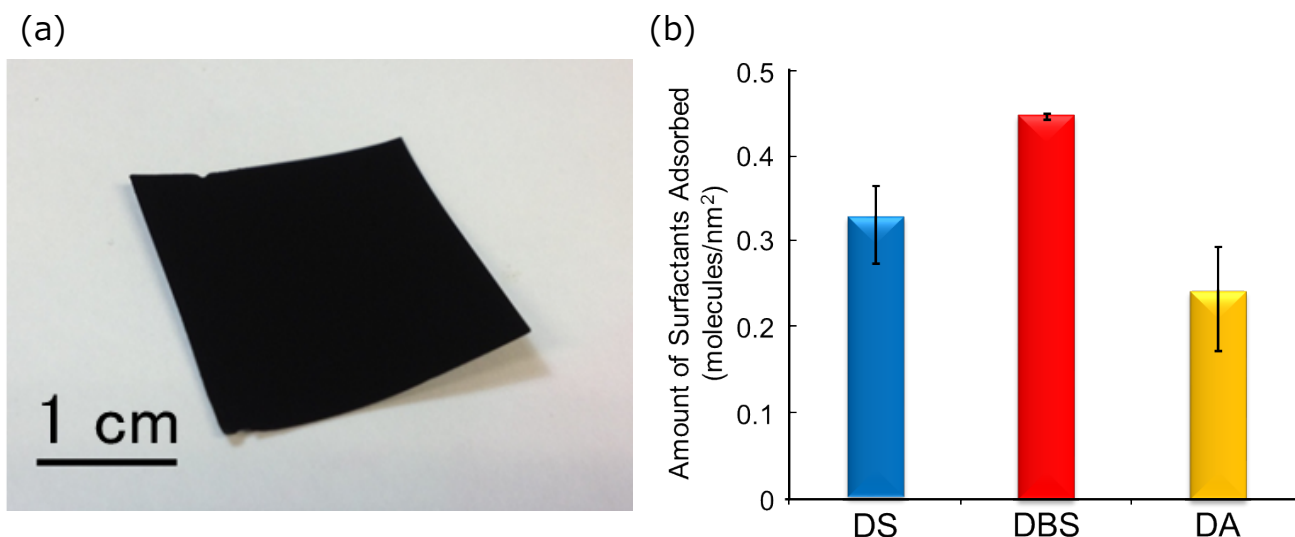

**Fig. S1.** (a) Photograph of the CNTF sheet used for evaluating the amount of surfactants adsorbed. (b) The density of surfactants adsorbed on CNTFs ( $n = 4$ ).

= 4).

- 1 T. Miyake, S. Yoshino, T. Yamada, K. Hata, M. Nishizawa, *J. Am. Chem. Soc.*, 2011, **133**, 5129–5134.
- 2 D.N. Futaba, K. Hata, T. Yamada, T. Hiraoka, Y. Hayamizu, Y. Kakudate, O. Tanaike, H. Hatori, M.

Yumura, S. Iijima, *Nature Materials*, 2006, **5**, 987–994.

### Information 2: Evaluation of the amount of enzymes inside a CNTF film

The amount of BOD inside CNTFs were evaluated by measuring the amount of extracted copper ions in the extracts.<sup>3</sup> As shown in Fig. 2, three pieces of 1×1 mm BOD-modified CNTF films were dispersed in an aqueous solution of 1% sodium cholate by using a bath sonicator, followed by boiling with nitric acid

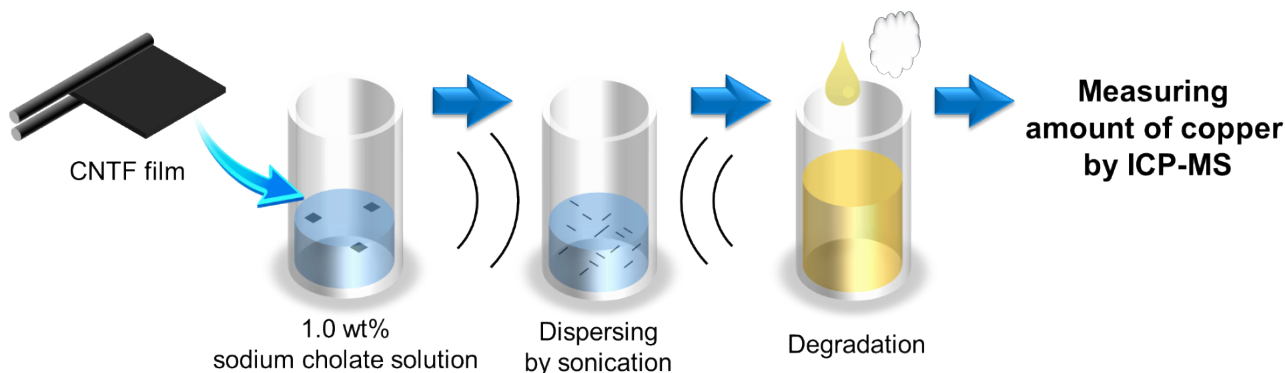

**Fig. S2.** Experimental procedure for evaluation of the amount of enzymes inside CNTF films.

and hydrogen peroxide at 120–140 °C for 2 h. The amount of copper ions in the solution was measured by ICP-MS (Aligent Technologies Aligent 8800), and converted to the amount of enzymes assuming 4 copper atoms / BOD molecule.<sup>3,4</sup>

- 3 K. So, S. Kawai, Y. Hamano, Y. Kitazumi, O. Shirai, M. Hibi, J. Ogawa and K. Kano, *PCCP*, 2014, **16**, 4823–4829.
- 4 N. Mano and L. Edembe, *Biosensors & Bioelectronics*, 2013, **50**, 478–485.

### Information 3: Theoretical prospect of BOD content inside CNTF

The previous structural analysis of the as-grown CNTF revealed a mean tube diameter of 2.8 nm by transmission electron microscopy (TEM) and an intertube pitch of 16 nm by X-ray diffraction.<sup>5</sup> The number of BOD ( $N_{\text{enz}}$ ) entrapped in a 12  $\mu\text{m}$  thick CNTF is estimated from the following equation:

$$N_{\text{enz}} = 4 (H/r) (S/U)$$

where  $H = 1.0$  mm (CNT length),  $r = 6.0 \times 10^{-6}$  mm (BOD diameter),<sup>6</sup>  $S = 12 \times 10^{-3}$  mm<sup>2</sup> (cross-sectional

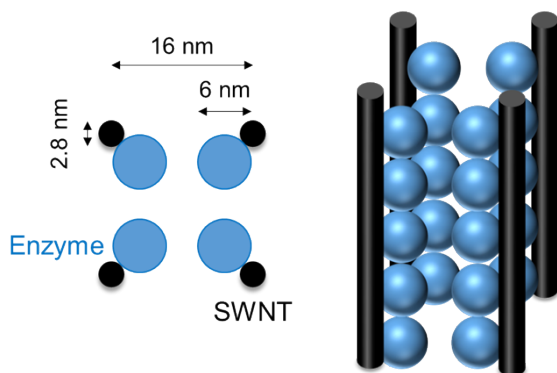

**Fig. S3** Illustrations of a CNTF whose void volume is occupied by 6 nm diameter globular BOD that adsorbs on the side-wall of the CNT.

area of CNTF sheet), and  $U = 2.6 \times 10^{-10}$  mm<sup>2</sup> (the area of the void space surrounded by 16 nm pitched CNTs). The entrapped mass (3.5  $\mu\text{g}$ ) is derived by multiplying  $N_{\text{enz}}$  by the molecular weight (68 kD) / Avogadro's constant.

5 D. N. Futaba, K. Hata, T. Yamada, T. Hiraoka, Y. Hayamizu, Y. Kakudate, O. Tanaike, H. Hatori, M. Yumura and S. Iijima, *Nature Materials*, 2006, **5**, 987–994.

6 M. Tominaga, M. Ohtani and I. Taniguchi, *PCCP*, 2008, **10**, 6928-6934.
